# Supplementary material for: Coordination of tissue cell polarity by auxin transport and signaling
Source: eLife. 2019 Dec 3;8:e51061. doi: 10.7554/eLife.51061 (PMC6890459; doi:10.7554/eLife.51061)
Supplement: Figure 2—source data 1. [file elife-51061-fig2-data1.xlsx]

## Sheet: Figure 2 — Source Data 1
Figure 2 — Source Data 1. Distribution of Leaves in Phenotype Classes												Figure 2 — Source Data 1. Distribution Summary of Leaves in Phenotype Classes														Figure 2 — Source Data 1. Statistical analysis
WT	gn-18	gnfwr	gnB/E	gnR5	gnvan7	gn-13;gnvan7+fwrno.5	gn-13;gnvan7+fwrno.7	gnSALK_103014	gn-13	gnemb30-8			Class 0	Class a1	Class a2	Class a3	Class a4	Class a5	Class a6	Class a7	Class a8	Class a9	Class a10	Total			gn-18	gnfwr	gnB/E	gnR5	gnvan7	gn-13;gnvan7+fwrno.5	gn-13;gnvan7+fwrno.7	gnSALK_103014	gn-13	gnemb30-8
1	1	5	6	7	7	7	7	8	9	9		WT	66	0	0	0	0	0	0	0	0	0	0	66		WT	8.399e-23	2.793e-25	2.208e-33	3.176e-36	8.548e-33	1.144e-30	2.727e-30	3.063e-22	2.068e-26	3.236e-24
1	1	5	6	7	7	7	7	8	9	9		gn-18	38	0	47	34	53	0	0	0	0	0	0	172		gn-18		1.112e-13	2.227e-39	1.013e-43	6.565e-47	2.032e-43	2.612e-42	4.73e-20	2.62e-30	7.579e-26
1	1	5	6	7	7	7	7	9	9	9		gnfwr	0	0	0	0	43	0	0	0	0	0	0	43		gnfwr			2.392e-28	3.416e-31	2.314e-25	1.985e-23	3.551e-23	7.045e-17	1.36e-20	1.715e-18
1	1	5	6	7	7	7	7	9	9	9		gnB/E	0	5	0	0	0	80	0	0	0	0	0	85		gnB/E				2.77e-39	8.284e-37	1.305e-34	3.544e-34	2.047e-25	9.431e-30	1.59e-27
1	1	5	6	7	7	7	7	9	9	9		gnR5	0	0	0	0	0	0	93	0	0	0	0	93		gnR5					8.083e-09	4.192e-18	3.071e-20	2.474e-28	8.765e-33	1.554e-30
1	1	5	6	7	7	7	7	9	9	9		gnvan7	0	0	0	0	0	0	76	24	9	0	0	109		gnvan7						0.0008264	4.26e-05	5.669e-18	4.558e-26	2.34e-23
1	1	5	6	7	7	7	7	9	9	9		gn-13;gnvan7+fwrno.5	0	0	0	0	0	0	41	53	3	0	0	97		gn-13;gnvan7+fwrno.5							0.3503	2.648e-17	7.205e-26	8.945e-23
1	1	5	6	7	7	7	7	9	9	9		gn-13;gnvan7+fwrno.7	0	0	0	0	0	0	34	54	5	0	0	93		gn-13;gnvan7+fwrno.7								1.805e-16	9.14e-25	6.211e-22
1	1	5	6	7	7	7	7	9	9	9		gnSALK_103014	0	0	0	0	0	0	0	2	24	1	5	32		gnSALK_103014									0.298	0.03558
1	1	5	6	7	7	7	7	9	9	9		gn-13	0	0	0	0	0	0	0	0	43	0	13	56		gn-13										0.1438
1	1	5	6	7	7	7	7	9	9	9		gnemb30-8	0	0	0	0	0	0	0	0	28	2	15	45
1	1	5	6	7	7	7	7	9	9	9
1	1	5	6	7	7	7	7	9	9	9
1	1	5	6	7	7	7	7	9	9	9		Figure 2 — Source Data 1. Distribution Summary of Leaves in Phenotype Classes
1	1	5	6	7	7	7	7	9	9	9			Class 0	Class a1	Class a2	Class a3	Class a4	Class a5	Class a6	Class a7	Class a8	Class a9	Class a10	Total
1	1	5	6	7	7	7	7	9	9	9		WT	100	0	0	0	0	0	0	0	0	0	0	100
1	1	5	6	7	7	7	7	9	9	9		gn-18	22.093	0	27.3256	19.7674	30.814	0	0	0	0	0	0	100
1	1	5	6	7	7	7	7	9	9	9		gnfwr	0	0	0	0	100	0	0	0	0	0	0	100
1	1	5	6	7	7	7	7	9	9	9		gnB/E	0	5.88235	0	0	0	94.1176	0	0	0	0	0	100
1	1	5	6	7	7	7	7	9	9	9		gnR5	0	0	0	0	0	0	100	0	0	0	0	100
1	1	5	6	7	7	7	7	9	9	9		gnvan7	0	0	0	0	0	0	69.7248	22.0183	8.25688	0	0	100
1	1	5	6	7	7	7	7	9	9	9		gn-13;gnvan7+fwrno.5	0	0	0	0	0	0	42.268	54.6392	3.09278	0	0	100
1	1	5	6	7	7	7	7	9	9	9		gn-13;gnvan7+fwrno.7	0	0	0	0	0	0	36.5591	58.0645	5.37634	0	0	100
1	1	5	6	7	7	7	7	9	9	9		gnSALK_103014	0	0	0	0	0	0	0	6.25	75	3.125	15.625	100
1	1	5	6	7	7	7	7	9	9	9		gn-13	0	0	0	0	0	0	0	0	76.7857	0	23.2143	100
1	1	5	6	7	7	7	7	9	9	9		gnemb30-8	0	0	0	0	0	0	0	0	62.2222	4.44444	33.3333	100
1	1	5	6	7	7	7	7	10	9	9
1	1	5	6	7	7	7	7	11	9	9
1	1	5	6	7	7	7	7	11	9	10
1	1	5	6	7	7	7	7	11	9	10
1	1	5	6	7	7	7	7	11	9	11
1	1	5	6	7	7	7	7	11	9	11
1	1	5	6	7	7	7	7		9	11
1	1	5	6	7	7	7	7		9	11
1	1	5	6	7	7	7	8		9	11
1	1	5	6	7	7	7	8		9	11
1	1	5	6	7	7	7	8		9	11
1	1	5	6	7	7	7	8		9	11
1	3	5	6	7	7	7	8		9	11
1	3	5	6	7	7	7	8		9	11
1	3	5	6	7	7	7	8		9	11
1	3	5	6	7	7	8	8		9	11
1	3	5	6	7	7	8	8		9	11
1	3		6	7	7	8	8		11	11
1	3		6	7	7	8	8		11	11
1	3		6	7	7	8	8		11
1	3		6	7	7	8	8		11
1	3		6	7	7	8	8		11
1	3		6	7	7	8	8		11
1	3		6	7	7	8	8		11
1	3		6	7	7	8	8		11
1	3		6	7	7	8	8		11
1	3		6	7	7	8	8		11
1	3		6	7	7	8	8		11
1	3		6	7	7	8	8		11
1	3		6	7	7	8	8		11
1	3		6	7	7	8	8
1	3		6	7	7	8	8
1	3		6	7	7	8	8
1	3		6	7	7	8	8
1	3		6	7	7	8	8
1	3		6	7	7	8	8
1	3		6	7	7	8	8
1	3		6	7	7	8	8
1	3		6	7	7	8	8
1	3		6	7	7	8	8
	3		6	7	7	8	8
	3		6	7	7	8	8
	3		6	7	7	8	8
	3		6	7	7	8	8
	3		6	7	7	8	8
	3		6	7	7	8	8
	3		6	7	7	8	8
	3		6	7	7	8	8
	3		6	7	7	8	8
	3		6	7	7	8	8
	3		6	7	8	8	8
	3		6	7	8	8	8
	3		6	7	8	8	8
	3		6	7	8	8	8
	3			7	8	8	8
	3			7	8	8	8
	3			7	8	8	8
	3			7	8	8	8
	3			7	8	8	8
	4			7	8	8	8
	4			7	8	8	8
	4			7	8	8	8
	4			7	8	8	9
	4			7	8	8	9
	4			7	8	8	9
	4			7	8	8	9
	4			7	8	8	9
	4				8	8
	4				8	9
	4				8	9
	4				8	9
	4				8
	4				8
	4				8
	4				9
	4				9
	4				9
	4				9
	4				9
	4				9
	4				9
	4				9
	4				9
	4
	4
	4
	4
	4
	4
	4
	4
	4
	4
	5
	5
	5
	5
	5
	5
	5
	5
	5
	5
	5
	5
	5
	5
	5
	5
	5
	5
	5
	5
	5
	5
	5
	5
	5
	5
	5
	5
	5
	5
	5
	5
	5
	5
	5
	5
	5
	5
	5
	5
	5
	5
	5
	5
	5
	5
	5
	5
	5
	5
	5
	5
	5
1, Class 0; 2, Class a1; 3, Class a2; 4, Class a3; 5, Class a4; 6, Class a5; 7, Class a6; 8, Class a7; 9, Class a8; 10, Class a9; 11, Class a10
