# Supplementary material for: Coordination of tissue cell polarity by auxin transport and signaling
Source: eLife. 2019 Dec 3;8:e51061. doi: 10.7554/eLife.51061 (PMC6890459; doi:10.7554/eLife.51061)
Supplement: Figure 3—source data 1. [file elife-51061-fig3-data1.xlsx]

## Sheet: Figure 3 — Source Data 1
Figure 3 — Source Data 1. Distribution of Leaves in Phenotype Classes									Figure 3 — Source Data 1. Distribution Summary of Leaves in Phenotype Classes								Figure 3 — Source Data 1. Statistical Analysis
WT	pin3;4;7	pin2;3;4;7	pin1-1	pin1-134	pin1-1,3;4;7	pin1-134,3;4;7	pin1-1,3;2;4;7			Class 0	Class b1	Class b2	Class b3	Class b4	Total			pin3;4;7	pin2;3;4;7	pin1-1	pin1-134	pin1-1,3;4;7	pin1-134,3;4;7	pin1-1,3;2;4;7
1	1	1	1	1	4	4	4		WT	58	0	0	0	0	58		WT	0.06128	0.1254	2.761e-14	6.528e-13	5.827e-28	1.672e-23	5.296e-33
1	1	1	1	1	4	4	4		pin3;4;7	96	6	0	0	0	102		pin3;4;7		0.6485	4.453e-17	6.934e-15	3.875e-37	8.105e-31	1.332e-42
1	1	1	1	1	4	4	4		pin2;3;4;7	47	2	0	0	0	49		pin2;3;4;7			2.778e-11	4.708e-10	2.246e-25	5.015e-21	2.006e-30
1	1	1	1	1	4	4	4		pin1-1	29	47	5	0	0	81		pin1-1				0.852	6.952e-30	1.311e-22	9.377e-36
1	1	1	1	1	4	4	4		pin1-134	17	27	4	0	0	48		pin1-134					4.946e-24	7.981e-19	2.689e-29
1	1	1	1	1	4	4	4		pin1-1,3;4;7	0	0	0	63	12	75		pin1-1,3;4;7						0.1374	0.168
1	1	1	1	1	4	4	4		pin1-134,3;4;7	0	0	0	42	3	45		pin1-134,3;4;7							0.63
1	1	1	1	1	4	4	4		pin1-1,3;2;4;7	0	0	0	90	9	99
1	1	1	1	1	4	4	4
1	1	1	1	1	4	4	4
1	1	1	1	1	4	4	4		Figure 3 — Source Data 1. Frequency of Leaves in Phenotype Classes
1	1	1	1	1	4	4	4			Class 0	Class b1	Class b2	Class b3	Class b4	Total
1	1	1	1	1	4	4	4		WT	100	0	0	0	0	100
1	1	1	1	1	4	4	4		pin3;4;7	94.1176	5.88235	0	0	0	100
1	1	1	1	1	4	4	4		pin2;3;4;7	95.9184	4.08163	0	0	0	100
1	1	1	1	1	4	4	4		pin1-1	35.8025	58.0247	6.17284	0	0	100
1	1	1	1	1	4	4	4		pin1-134	35.4167	56.25	8.33333	0	0	100
1	1	1	1	2	4	4	4		pin1-1,3;4;7	0	0	0	84	16	100
1	1	1	1	2	4	4	4		pin1-134,3;4;7	0	0	0	93.3333	6.66667	100
1	1	1	1	2	4	4	4		pin1-1,3;2;4;7	0	0	0	90.9091	9.09091	100
1	1	1	1	2	4	4	4
1	1	1	1	2	4	4	4
1	1	1	1	2	4	4	4
1	1	1	1	2	4	4	4
1	1	1	1	2	4	4	4
1	1	1	1	2	4	4	4
1	1	1	1	2	4	4	4
1	1	1	1	2	4	4	4
1	1	1	1	2	4	4	4
1	1	1	2	2	4	4	4
1	1	1	2	2	4	4	4
1	1	1	2	2	4	4	4
1	1	1	2	2	4	4	4
1	1	1	2	2	4	4	4
1	1	1	2	2	4	4	4
1	1	1	2	2	4	4	4
1	1	1	2	2	4	4	4
1	1	1	2	2	4	4	4
1	1	1	2	2	4	4	4
1	1	1	2	2	4	4	4
1	1	1	2	2	4	4	4
1	1	1	2	2	4	4	4
1	1	1	2	2	4	5	4
1	1	1	2	2	4	5	4
1	1	1	2	3	4	5	4
1	1	1	2	3	4		4
1	1	1	2	3	4		4
1	1	2	2	3	4		4
1	1	2	2		4		4
1	1		2		4		4
1	1		2		4		4
1	1		2		4		4
1	1		2		4		4
1	1		2		4		4
1	1		2		4		4
1	1		2		4		4
1	1		2		4		4
1	1		2		4		4
	1		2		4		4
	1		2		4		4
	1		2		4		4
	1		2		4		4
	1		2		4		4
	1		2		5		4
	1		2		5		4
	1		2		5		4
	1		2		5		4
	1		2		5		4
	1		2		5		4
	1		2		5		4
	1		2		5		4
	1		2		5		4
	1		2		5		4
	1		2		5		4
	1		2		5		4
	1		2				4
	1		3				4
	1		3				4
	1		3				4
	1		3				4
	1		3				4
	1						4
	1						4
	1						4
	1						4
	1						4
	1						4
	1						4
	1						4
	1						4
	1						5
	1						5
	1						5
	1						5
	1						5
	1						5
	2						5
	2						5
	2						5
	2
	2
	2
1, Class 0; 2, Class b1; 3, Class b2; 4, Class b3; 5, Class b4.
