# Supplementary material for: Coordination of tissue cell polarity by auxin transport and signaling
Source: eLife. 2019 Dec 3;8:e51061. doi: 10.7554/eLife.51061 (PMC6890459; doi:10.7554/eLife.51061)
Supplement: Figure 3—source data 2. [file elife-51061-fig3-data2.xlsx]

## Sheet: Figure 3 — Source Data 2
Figure 3 — Source Data 2. Distribution of Leaves in Phenotype Classes					Figure 3 — Source Data 2. Distribution Summary of Leaves in Phenotype Classes								Figure 3 — Source Data 2. Statistical Analysis
WT	pin6;8	pin1,3;4;7	pin1,3,6;4;7;8			Class 0	Class b3	Class b4	Class b7	Class b8	Total			pin6;8	pin1,3;4;7	pin1,3,6;4;7;8
1	1	2	4		WT	51	0	0	0	0	51		WT	1	2.914e-22	3.959e-26
1	1	2	4		pin6;8	47	0	0	0	0	47		pin6;8		2.657e-21	4.495e-25
1	1	2	4		pin1,3;4;7	0	43	6	0	0	49		pin1,3;4;7			5.423e-25
1	1	2	4		pin1,3,6;4;7;8	0	0	0	63	10	73
1	1	2	4
1	1	2	4
1	1	2	4		Figure 3 — Source Data 2. Frequency of Leaves in Phenotype Classes
1	1	2	4			Class 0	Class b3	Class b4	Class b7	Class b8	Total
1	1	2	4		WT	100	0	0	0	0	100
1	1	2	4		pin6;8	100	0	0	0	0	100
1	1	2	4		pin1,3;4;7	0	87.7551	12.2449	0	0	100
1	1	2	4		pin1,3,6;4;7;8	0	0	0	86.3014	13.6986	100
1	1	2	4
1	1	2	4
1	1	2	4
1	1	2	4
1	1	2	4
1	1	2	4
1	1	2	4
1	1	2	4
1	1	2	4
1	1	2	4
1	1	2	4
1	1	2	4
1	1	2	4
1	1	2	4
1	1	2	4
1	1	2	4
1	1	2	4
1	1	2	4
1	1	2	4
1	1	2	4
1	1	2	4
1	1	2	4
1	1	2	4
1	1	2	4
1	1	2	4
1	1	2	4
1	1	2	4
1	1	2	4
1	1	2	4
1	1	2	4
1	1	2	4
1	1	3	4
1	1	3	4
1	1	3	4
1	1	3	4
1		3	4
1		3	4
1			4
1			4
			4
			4
			4
			4
			4
			4
			4
			4
			4
			4
			4
			4
			5
			5
			5
			5
			5
			5
			5
			5
			5
			5
1, Class 0; 2, Class b3; 3, Class b4; 4, Class b7; 5, Class b8.
