# Supplementary material for: Coordination of tissue cell polarity by auxin transport and signaling
Source: eLife. 2019 Dec 3;8:e51061. doi: 10.7554/eLife.51061 (PMC6890459; doi:10.7554/eLife.51061)
Supplement: Figure 4—source data 1. [file elife-51061-fig4-data1.xlsx]

## Sheet: Figure 4 — Source Data 1
Figure 4 — Source Data 1. Distribution of Leaves in Phenotype Classes							Figure 4 — Source Data 1. Distribution Summary of Leaves in Phenotype Classes								Figure 4 — Source Data 1. Statistical Analysis
WT	WT + NPA	pin1,3;4;7	pin1,3;4;7 + NPA	pin1,3,6;4;7;8	pin1,3,6;4;7;8 + NPA			Class 0	Class b3	Class b4	Class b7	Class b8	Total			WT + NPA	pin1,3;4;7	pin1,3;4;7 + NPA	pin1,3,6;4;7;8	pin1,3,6;4;7;8 + NPA
1	4	2	4	4	4		WT	38	0	0	0	0	38		WT	1.084e-18	1.729e-15	1.431e-20	9.024e-22	2.748e-18
1	4	2	4	4	4		WT + NPA	0	0	0	41	0	41		WT + NPA		3.339e-16	0.02215	0.002924	0.00209
1	4	2	4	4	4		pin1,3;4;7	0	24	6	0	0	30		pin1,3;4;7			5.501e-18	5.572e-19	1.224e-15
1	4	2	4	4	4		pin1,3;4;7 + NPA	0	0	0	51	7	58		pin1,3;4;7 + NPA				0.2741	0.225
1	4	2	4	4	4		pin1,3,6;4;7;8	0	0	0	59	14	73		pin1,3,6;4;7;8					0.8269
1	4	2	4	4	4		pin1,3,6;4;7;8 + NPA	0	0	0	38	10	48
1	4	2	4	4	4
1	4	2	4	4	4
1	4	2	4	4	4		Figure 4 — Source Data 1. Frequency of Leaves in Phenotype Classes
1	4	2	4	4	4			Class 0	Class b3	Class b4	Class b7	Class b8	Total
1	4	2	4	4	4		WT	100	0	0	0	0	100
1	4	2	4	4	4		WT + NPA	0	0	0	100	0	100
1	4	2	4	4	4		pin1,3;4;7	0	80	20	0	0	100
1	4	2	4	4	4		pin1,3;4;7 + NPA	0	0	0	87.931	12.069	100
1	4	2	4	4	4		pin1,3,6;4;7;8	0	0	0	80.8219	19.1781	100
1	4	2	4	4	4		pin1,3,6;4;7;8 + NPA	0	0	0	79.1667	20.8333	100
1	4	2	4	4	4
1	4	2	4	4	4
1	4	2	4	4	4
1	4	2	4	4	4
1	4	2	4	4	4
1	4	2	4	4	4
1	4	2	4	4	4
1	4	2	4	4	4
1	4	3	4	4	4
1	4	3	4	4	4
1	4	3	4	4	4
1	4	3	4	4	4
1	4	3	4	4	4
1	4	3	4	4	4
1	4		4	4	4
1	4		4	4	4
1	4		4	4	4
1	4		4	4	4
1	4		4	4	4
1	4		4	4	4
1	4		4	4	4
1	4		4	4	4
	4		4	4	5
	4		4	4	5
	4		4	4	5
			4	4	5
			4	4	5
			4	4	5
			4	4	5
			4	4	5
			4	4	5
			4	4	5
			4	4
			4	4
			4	4
			5	4
			5	4
			5	4
			5	4
			5	4
			5	4
			5	4
				4
				5
				5
				5
				5
				5
				5
				5
				5
				5
				5
				5
				5
				5
				5
1, Class 0; 2, Class b3; 3, Class b4; 4, Class b7; 5, Class b8.
