# Supplementary material for: Coordination of tissue cell polarity by auxin transport and signaling
Source: eLife. 2019 Dec 3;8:e51061. doi: 10.7554/eLife.51061 (PMC6890459; doi:10.7554/eLife.51061)
Supplement: Figure 5—source data 1. [file elife-51061-fig5-data1.xlsx]

## Sheet: Figure 5 — Source Data 1
Figure 5 — Source Data 1. Distribution of Leaves in Phenotype Classes									Figure 5 — Source Data 1. Distribution Summary of Leaves in Phenotype Classes										Figure 5 — Source Data 1. Statistical Analysis
WT	abcb1;19	pin1,3,6	pin1,3,6;abcb1;19	WT + NPA	abcb1;19 + NPA	twd1	twd1 + NPA			Class 0	Class b1	Class b2	Class b5	Class b6	Class b7	Class b8	Total			abcb1;19	pin1,3,6	pin1,3,6;abcb1;19	WT + NPA	abcb1;19 + NPA	twd1	twd1 + NPA
1	1	1	1	6	6	1	6		WT	41	0	0	0	0	0	0	41		WT	0.07816	4.497e-20	4.087e-18	1.426e-19	1.33e-19	2.224e-06	1.301e-18
1	1	2	1	6	6	1	6		abcb1;19	37	3	0	0	0	0	0	40		abcb1;19		1.871e-19	2.019e-17	8.116e-19	6.719e-19	0.0001442	6.12e-18
1	1	2	2	6	6	1	6		pin1,3,6	1	3	0	28	5	25	18	80		pin1,3,6			0.3339	0.01203	0.003728	1.923e-18	0.0002536
1	1	2	2	6	6	1	6		pin1,3,6;abcb1;19	2	2	0	13	7	22	16	62		pin1,3,6;abcb1;19				0.1564	0.06855	4.425e-16	0.007629
1	1	4	4	6	6	1	6		WT + NPA	0	0	0	0	0	42	1	43		WT + NPA					0.1983	1.317e-17	0.003117
1	1	4	4	6	6	1	6		abcb1;19 + NPA	0	0	0	0	0	42	4	46		abcb1;19 + NPA						7.337e-18	0.05014
1	1	4	4	6	6	1	6		twd1	23	11	7	0	0	0	0	41		twd1							4.776e-17
1	1	4	4	6	6	1	6		twd1 + NPA	0	0	0	0	0	35	11	46
1	1	4	4	6	6	1	6
1	1	4	4	6	6	1	6
1	1	4	4	6	6	1	6		Figure 5 — Source Data 1. Frequency of Leaves in Phenotype Classes
1	1	4	4	6	6	1	6			Class 0	Class b1	Class b2	Class b5	Class b6	Class b7	Class b8	Total
1	1	4	4	6	6	1	6		WT	100	0	0	0	0	0	0	100
1	1	4	4	6	6	1	6		abcb1;19	92.5	7.5	0	0	0	0	0	100
1	1	4	4	6	6	1	6		pin1,3,6	1.25	3.75	0	35	6.25	31.25	22.5	100
1	1	4	4	6	6	1	6		pin1,3,6;abcb1;19	3.22581	3.22581	0	20.9677	11.2903	35.4839	25.8065	100
1	1	4	4	6	6	1	6		WT + NPA	0	0	0	0	0	97.6744	2.32558	100
1	1	4	5	6	6	1	6		abcb1;19 + NPA	0	0	0	0	0	91.3043	8.69565	100
1	1	4	5	6	6	1	6		twd1	56.0976	26.8293	17.0732	0	0	0	0	100
1	1	4	5	6	6	1	6		twd1 + NPA	0	0	0	0	0	76.087	23.913	100
1	1	4	5	6	6	1	6
1	1	4	5	6	6	1	6
1	1	4	5	6	6	1	6
1	1	4	5	6	6	2	6
1	1	4	6	6	6	2	6
1	1	4	6	6	6	2	6
1	1	4	6	6	6	2	6
1	1	4	6	6	6	2	6
1	1	4	6	6	6	2	6
1	1	4	6	6	6	2	6
1	1	4	6	6	6	2	6
1	1	4	6	6	6	2	6
1	1	5	6	6	6	2	6
1	1	5	6	6	6	2	6
1	1	5	6	6	6	3	6
1	1	5	6	6	6	3	7
1	1	5	6	6	6	3	7
1	2	6	6	6	6	3	7
1	2	6	6	6	6	3	7
1	2	6	6	6	6	3	7
1		6	6	6	6	3	7
		6	6	6	6		7
		6	6	7	7		7
		6	6		7		7
		6	6		7		7
		6	6		7		7
		6	7
		6	7
		6	7
		6	7
		6	7
		6	7
		6	7
		6	7
		6	7
		6	7
		6	7
		6	7
		6	7
		6	7
		6	7
		6	7
		7
		7
		7
		7
		7
		7
		7
		7
		7
		7
		7
		7
		7
		7
		7
		7
		7
		7
1, Class 0; 2, Class b1; 3, Class b2; 4, Class b5; 5, Class b6; 6, Class b7; 7, Class b8.
