# Supplementary material for: Coordination of tissue cell polarity by auxin transport and signaling
Source: eLife. 2019 Dec 3;8:e51061. doi: 10.7554/eLife.51061 (PMC6890459; doi:10.7554/eLife.51061)
Supplement: Figure 5—source data 2. [file elife-51061-fig5-data2.xlsx]

## Sheet: Figure 5 — Source Data 2
Figure 5 — Source Data 2. Distribution of Leaves in Phenotype Classes								Figure 5 — Source Data 2. Distribution Summary of Leaves in Phenotype Classes									Figure 5 — Source Data 2. Statistical Analysis
WT	aux1-21;lax1;2;3	aux1-355;lax1-064	pin1,3,6	pin1,3,6;aux1-355;lax1-064	WT + NPA	aux1-21;lax1;2;3 + NPA			Class 0	Class b1	Class b5	Class b6	Class b7	Class b8	Total			aux1-21;lax1;2;3	aux1-355;lax1-064	pin1,3,6	pin1,3,6;aux1-355;lax1-064	WT + NPA	aux1-21;lax1;2;3 + NPA
1	1	1	1	3	5	5		WT	53	0	0	0	0	0	53		WT	1	0.09472	1.114e-23	3.433e-22	4.357e-23	1.988e-20
1	1	1	2	3	5	5		aux1-21;lax1;2;3	60	0	0	0	0	0	60		aux1-21;lax1;2;3		0.07543	1.2e-25	4.664e-24	1.269e-24	4.165e-22
1	1	1	3	3	5	5		aux1-355;lax1-064	73	4	0	0	0	0	77		aux1-355;lax1-064			1.973e-29	1.67e-27	4.881e-27	1.073e-24
1	1	1	3	3	5	5		pin1,3,6	1	1	38	1	19	15	75		pin1,3,6				0.03882	0.0003999	3.822e-06
1	1	1	3	3	5	5		pin1,3,6;aux1-355;lax1-064	0	0	21	3	15	19	58		pin1,3,6;aux1-355;lax1-064					0.3973	0.01335
1	1	1	3	3	5	5		WT + NPA	0	0	0	0	46	0	46		WT + NPA						3.11e-05
1	1	1	3	3	5	5		aux1-21;lax1;2;3 + NPA	0	0	0	0	27	13	40
1	1	1	3	3	5	5
1	1	1	3	3	5	5
1	1	1	3	3	5	5		Figure 5 — Source Data 2. Frequency of Leaves in Phenotype Classes
1	1	1	3	3	5	5			Class 0	Class b1	Class b5	Class b6	Class b7	Class b8	Total
1	1	1	3	3	5	5		WT	100	0	0	0	0	0	100
1	1	1	3	3	5	5		aux1-21;lax1;2;3	100	0	0	0	0	0	100
1	1	1	3	3	5	5		aux1-355;lax1-064	94.8052	5.19481	0	0	0	0	100
1	1	1	3	3	5	5		pin1,3,6	1.33333	1.33333	50.6667	1.33333	25.3333	20	100
1	1	1	3	3	5	5		pin1,3,6;aux1-355;lax1-064	0	0	36.2069	5.17241	25.8621	32.7586	100
1	1	1	3	3	5	5		WT + NPA	0	0	0	0	100	0	100
1	1	1	3	3	5	5		aux1-21;lax1;2;3 + NPA	0	0	0	0	67.5	32.5	100
1	1	1	3	3	5	5
1	1	1	3	3	5	5
1	1	1	3	3	5	5
1	1	1	3	4	5	5
1	1	1	3	4	5	5
1	1	1	3	4	5	5
1	1	1	3	5	5	5
1	1	1	3	5	5	5
1	1	1	3	5	5	5
1	1	1	3	5	5	6
1	1	1	3	5	5	6
1	1	1	3	5	5	6
1	1	1	3	5	5	6
1	1	1	3	5	5	6
1	1	1	3	5	5	6
1	1	1	3	5	5	6
1	1	1	3	5	5	6
1	1	1	3	5	5	6
1	1	1	3	5	5	6
1	1	1	3	5	5	6
1	1	1	3	5	5	6
1	1	1	3	6	5	6
1	1	1	4	6	5
1	1	1	5	6	5
1	1	1	5	6	5
1	1	1	5	6	5
1	1	1	5	6	5
1	1	1	5	6	5
1	1	1	5	6
1	1	1	5	6
1	1	1	5	6
1	1	1	5	6
1	1	1	5	6
1	1	1	5	6
1	1	1	5	6
	1	1	5	6
	1	1	5	6
	1	1	5	6
	1	1	5	6
	1	1	5	6
	1	1	5
	1	1	5
		1	6
		1	6
		1	6
		1	6
		1	6
		1	6
		1	6
		1	6
		1	6
		1	6
		1	6
		1	6
		1	6
		2	6
		2	6
		2
		2
1, Class 0; 2, Class b1; 3, Class b5; 4, Class b6; 5, Class b7; 6, Class b8.
