# Supplementary material for: Coordination of tissue cell polarity by auxin transport and signaling
Source: eLife. 2019 Dec 3;8:e51061. doi: 10.7554/eLife.51061 (PMC6890459; doi:10.7554/eLife.51061)
Supplement: Figure 6—source data 1. [file elife-51061-fig6-data1.xlsx]

## Sheet: Figure 6 — Source Data 1
Figure 6 — Source Data 1. Distribution of Leaves in Phenotype Classes								Figure 6 — Source Data 1. Distribution Summary of Leaves in Phenotype Classes												Figure 6 — Source Data 1. Statistical Analysis
WT	pin1,3;4;7	pin1,3,6;4;7;8	gn	gn;pin1,3;4;7	gn;pin1,3,6;4;7;8	gn + NPA			Class 0	Class b3	Class b4	Class b7	Class b8	Class a8	Class a9	Class a10	Class a11	Total			pin1,3;4;7	pin1,3,6;4;7;8	gn	gn;pin1,3;4;7	gn;pin1,3,6;4;7;8	gn + NPA
1	2	4	6	6	6	6		WT	63	0	0	0	0	0	0	0	0	63		WT	2.559e-25	1.112e-25	1.447e-27	2.158e-19	1.808e-18	5.606e-26
1	2	4	6	6	6	6		pin1,3;4;7	0	42	11	0	0	0	0	0	0	53		pin1,3;4;7		1.046e-21	7.187e-24	1.261e-13	6.211e-12	3.626e-22
1	2	4	6	6	6	6		pin1,3,6;4;7;8	0	0	0	46	6	0	0	0	0	52		pin1,3,6;4;7;8			5.028e-24	1.314e-14	4.13e-13	2.159e-22
1	2	4	6	6	6	6		gn	0	0	0	0	0	52	0	17	0	69		gn				4.661e-07	0.001241	3.765e-13
1	2	4	6	8	6	6		gn;pin1,3;4;7	0	0	0	0	0	4	0	12	5	21		gn;pin1,3;4;7					0.06219	0.4772
1	2	4	6	8	7	7		gn;pin1,3,6;4;7;8	0	0	0	0	0	5	1	10	0	16		gn;pin1,3,6;4;7;8						0.03523
1	2	4	6	8	8	7		gn + NPA	0	0	0	0	0	5	6	43	6	60
1	2	4	6	8	8	7
1	2	4	6	8	8	7
1	2	4	6	8	8	7		Figure 6 — Source Data 1. Frequency of Leaves in Phenotype Classes
1	2	4	6	8	8	7			Class 0	Class b3	Class b4	Class b7	Class b8	Class a8	Class a9	Class a10	Class a11	Total
1	2	4	6	8	8	8		WT	100	0	0	0	0	0	0	0	0	100
1	2	4	6	8	8	8		pin1,3;4;7	0	79.2453	20.7547	0	0	0	0	0	0	100
1	2	4	6	8	8	8		pin1,3,6;4;7;8	0	0	0	88.4615	11.5385	0	0	0	0	100
1	2	4	6	8	8	8		gn	0	0	0	0	0	75.3623	0	24.6377	0	100
1	2	4	6	8	8	8		gn;pin1,3;4;7	0	0	0	0	0	19.0476	0	57.1429	23.8095	100
1	2	4	6	9		8		gn;pin1,3,6;4;7;8	0	0	0	0	0	31.25	6.25	62.5	0	100
1	2	4	6	9		8		gn + NPA	0	0	0	0	0	8.33333	10	71.6667	10	100
1	2	4	6	9		8
1	2	4	6	9		8
1	2	4	6	9		8
1	2	4	6			8
1	2	4	6			8
1	2	4	6			8
1	2	4	6			8
1	2	4	6			8
1	2	4	6			8
1	2	4	6			8
1	2	4	6			8
1	2	4	6			8
1	2	4	6			8
1	2	4	6			8
1	2	4	6			8
1	2	4	6			8
1	2	4	6			8
1	2	4	6			8
1	2	4	6			8
1	2	4	6			8
1	2	4	6			8
1	2	4	6			8
1	2	4	6			8
1	2	4	6			8
1	3	4	6			8
1	3	4	6			8
1	3	4	6			8
1	3	4	6			8
1	3	5	6			8
1	3	5	6			8
1	3	5	6			8
1	3	5	6			8
1	3	5	6			8
1	3	5	6			8
1	3		8			8
1			8			8
1			8			9
1			8			9
1			8			9
1			8			9
1			8			9
1			8			9
1			8
1			8
1			8
			8
			8
			8
			8
			8
			8
1, Class 0; 2, Class b3; 3, Class b4; 4, Class b7; 5, Class b8; 6, Class a8; 7, Class a9; 8, Class a10; 9, Class a11.
1, Class α1; 2, Class α2; 4, Class α4; 5, Class α5; 6, Class α6; 7, Class α7.
