# Supplementary material for: Coordination of tissue cell polarity by auxin transport and signaling
Source: eLife. 2019 Dec 3;8:e51061. doi: 10.7554/eLife.51061 (PMC6890459; doi:10.7554/eLife.51061)
Supplement: Figure 8—source data 1. [file elife-51061-fig8-data1.xlsx]

## Sheet: Figure 8 — Source Data 1
Figure 8 — Source Data 1. Distribution of Leaves in Phenotype Classes.															Figure 8 — Source Data 1. Distribution Summary of Leaves in Phenotype Classes													Figure 8 — Source Data 1. Statistical Analysis
WT	axr1-3	axr-12	tir1;afb2	WT + 10µM PBA	pin1,3,6;4;7;8	WT + 25µM NPA	WT + 100µM NPA	axr1-3 + 100µM NPA	axr1-12 + 100µM NPA	tir1;afb2 + 100µM NPA	WT + 10µM PBA + 25µM NPA	axr1;pin1,3,6;4;7;8	tir1;afb2;pin1,3,6;4;7;8			Class 0	Class a2	Class a3	Class a4	Class b3	Class b7	Class b8	Class b7/a6	Class b8/a6	Class a6	Total			axr1-3	axr-12	tir1;afb2	WT + 10µM PBA	pin1,3,6;4;7;8	WT + 25µM NPA	WT + 100µM NPA	axr1-3 + 100µM NPA	axr1-12 + 100µM NPA	tir1;afb2 + 100µM NPA	WT + 10µM PBA + 25µM NPA	axr1;pin1,3,6;4;7;8	tir1;afb2;pin1,3,6;4;7;8
1	1	1	2	1	6	5	6	6	6	6	5	6	5		WT	46	1	0	0	0	0	0	0	0	0	47		WT	2.848e-11	3.878e-15	1.571e-18	6.248e-16	4.626e-20	1.465e-21	1.077e-41	2.478e-24	9.973e-25	3.787e-21	9.818e-25	8.975e-21	5.914e-22
1	1	1	2	1	6	5	6	6	6	6	5	6	5		axr1-3	12	12	4	13	0	0	0	0	0	0	41		axr1-3		0.1226	0.01829	0.1064	8.734e-17	6.398e-17	1.635e-39	8.698e-22	3.548e-22	1.776e-18	3.498e-22	4.526e-18	2.282e-19
1	1	1	2	1	6	5	6	6	6	8	5	6	5		axr-12	5	15	3	18	0	0	0	0	0	0	41		axr-12			0.4613	0.9347	6.857e-17	1.148e-16	1.498e-39	8.169e-22	3.335e-22	1.57e-18	3.296e-22	3.973e-18	2.068e-19
1	1	1	2	1	6	5	6	6	6	8	5	6	5		tir1;afb2	0	21	0	21	0	0	0	0	0	0	42		tir1;afb2				0.5229	2.803e-17	6.907e-17	7.159e-40	3.314e-22	1.347e-22	6.683e-19	1.326e-22	1.691e-18	8.746e-20
1	1	1	2	1	6	5	6	6	6	8	5	6	5		WT + 10µM PBA	9	36	0	10	0	0	0	0	0	0	55		WT + 10µM PBA					3.006e-19	2.863e-18	8.391e-43	3.378e-26	1.299e-26	5.917e-22	1.121e-26	1.81e-21	3.767e-23
1	1	2	2	1	6	5	6	6	6	8	5	6	5		pin1,3,6;4;7;8	0	0	0	0	0	38	5	0	0	0	43		pin1,3,6;4;7;8						4.325e-20	0.006361	6.095e-18	3.647e-18	1.382e-18	4.724e-07	8.632e-09	7.078e-09
1	1	2	2	1	6	5	6	6	6	8	5	6	5		WT + 25µM NPA	0	0	0	0	0	46	2	0	0	0	48		WT + 25µM NPA							6.903e-42	1.271e-24	5.091e-25	2.447e-21	8.572e-19	5.935e-21	1.348e-17
1	1	2	2	1	6	5	6	6	6	8	5	6	5		WT + 100µM NPA	0	0	0	0	0	143	3	0	0	0	146		WT + 100µM NPA								9.801e-43	1.156e-42	1.206e-42	5.888e-18	1.094e-24	1.789e-21
1	1	2	2	1	6	5	6	6	6	8	5	6	5		axr1-3 + 100µM NPA	0	0	0	0	0	11	9	52	6	23	101		axr1-3 + 100µM NPA									0.5451	4.333e-05	5.042e-11	0.03129	0.02812
1	1	2	2	3	6	5	6	6	6	8	5	6	5		axr1-12 + 100µM NPA	0	0	0	0	0	12	4	56	3	28	103		axr1-12 + 100µM NPA										0.0003756	3.036e-12	0.01202	0.008417
1	1	2	2	3	6	5	6	6	6	8	5	6	5		tir1;afb2 + 100µM NPA	0	0	0	0	0	2	0	22	17	24	65		tir1;afb2 + 100µM NPA											2.003e-17	1.386e-05	2.386e-06
1	1	2	2	3	6	5	6	7	6	8	5	6	6		WT + 10µM PBA + 25µM NPA	0	0	0	0	0	18	9	56	0	22	105		WT + 10µM PBA + 25µM NPA												0.007474	0.002398
1	2	2	2	3	6	5	6	7	7	8	5	6	6		axr1;pin1,3,6;4;7;8	0	0	0	0	0	22	5	18	1	16	62		axr1;pin1,3,6;4;7;8													0.9333
1	2	2	2	3	6	5	6	7	7	8	5	6	6		tir1;afb2;pin1,3,6;4;7;8	0	0	0	10	0	11	3	28	0	23	75
1	2	2	2	3	6	5	6	7	7	8	5	6	7
1	2	2	2	3	6	5	6	7	7	8	5	6	7
1	2	2	2	3	6	5	6	7	8	8	5	6	7		Figure 8 — Source Data 1. Frequency of Leaves in Phenotype Classes
1	2	2	2	3	6	5	6	7	8	8	5	6	7			Class 0	Class a2	Class a3	Class a4	Class b3	Class b7	Class b8	Class b7/a6	Class b8/a6	Class a6	Total
1	2	2	2	3	6	5	6	7	8	8	6	6	7		WT	97.8723	2.12766	0	0	0	0	0	0	0	0	100
1	2	2	2	3	6	5	6	7	8	8	6	6	7		axr1-3	29.2683	29.2683	9.7561	31.7073	0	0	0	0	0	0	100
1	2	3	2	3	6	5	6	8	8	8	6	6	7		axr-12	12.1951	36.5854	7.31707	43.9024	0	0	0	0	0	0	100
1	2	3	4	3	6	5	6	8	8	8	6	6	7		tir1;afb2	0	50	0	50	0	0	0	0	0	0	100
1	2	3	4	3	6	5	6	8	8	8	6	7	7		WT + 10µM PBA	16.3636	65.4545	0	18.1818	0	0	0	0	0	0	100
1	2	4	4	3	6	5	6	8	8	8	6	7	7		pin1,3,6;4;7;8	0	0	0	0	0	88.3721	11.6279	0	0	0	100
1	3	4	4	3	6	5	6	8	8	9	6	7	7		WT + 25µM NPA	0	0	0	0	0	95.8333	4.16667	0	0	0	100
1	3	4	4	3	6	5	6	8	8	9	6	7	7		WT + 100µM NPA	0	0	0	0	0	97.9452	2.05479	0	0	0	100
1	3	4	4	3	6	5	6	8	8	9	6	7	7		axr1-3 + 100µM NPA	0	0	0	0	0	10.8911	8.91089	51.4851	5.94059	22.7723	100
1	3	4	4	3	6	5	6	8	8	9	7	8	7		axr1-12 + 100µM NPA	0	0	0	0	0	11.6505	3.8835	54.3689	2.91262	27.1845	100
1	4	4	4	3	6	5	6	8	8	9	7	8	7		tir1;afb2 + 100µM NPA	0	0	0	0	0	3.07692	0	33.8462	26.1538	36.9231	100
1	4	4	4	3	6	5	6	8	8	9	7	8	7		WT + 10µM PBA + 25µM NPA	0	0	0	0	0	17.1429	8.57143	53.3333	0	20.9524	100
1	4	4	4	3	6	5	6	8	8	9	7	8	7		axr1;pin1,3,6;4;7;8	0	0	0	0	0	35.4839	8.06452	29.0323	1.6129	25.8065	100
1	4	4	4	3	6	5	6	8	8	9	7	8	7		tir1;afb2;pin1,3,6;4;7;8	0	0	0	13.3333	0	14.6667	4	37.3333	0	30.6667	100
1	4	4	4	3	6	5	6	8	8	9	7	8	7
1	4	4	4	3	6	5	6	8	8	9	7	8	7
1	4	4	4	3	6	5	6	8	8	9	7	8	7
1	4	4	4	3	6	5	6	8	8	9	7	8	7
1	4	4	4	3	6	5	6	8	8	9	7	8	7
1	4	4	4	3	6	5	6	8	8	9	7	8	7
1	4	4	4	3	7	5	6	8	8	9	7	8	7
1	4	4	4	3	7	5	6	8	8	9	7	8	7
1	4	4	4	3	7	5	6	8	8	9	7	8	7
1			4	3	7	5	6	8	8	10	7	8	7
1				3	7	5	6	8	8	10	7	8	9
1				3		5	6	8	8	10	7	8	9
1				3		5	6	8	8	10	7	8	9
1				4		5	6	8	8	10	7	9	9
2				4		2	6	8	8	10	7	10	9
				4		2	6	8	8	10	7	10	9
				4			6	8	8	10	7	10	9
				4			6	8	8	10	7	10	9
				4			6	8	8	10	7	10	9
				4			6	8	8	10	7	10	9
				4			6	8	8	10	7	10	9
				4			6	8	8	10	7	10	9
				4			6	8	8	10	7	10	9
							6	8	8	10	7	10	9
							6	8	8	10	7	10	9
							6	8	8	10	7	10	9
							6	8	8	10	7	10	9
							6	8	8	10	7	10	9
							6	8	8	10	7	10	9
							6	8	8	10	7	10	9
							6	8	8	10	7		9
							6	8	8	10	7		9
							6	8	8	10	7		9
							6	8	8		7		10
							6	8	8		7		10
							6	8	8		7		10
							6	8	8		7		10
							6	8	8		7		10
							6	8	8		7		10
							6	8	8		7		10
							6	9	9		7		10
							6	9	9		7		10
							6	9	9		7		10
							6	9	10		7
							6	9	10		7
							6	9	10		7
							6	10	10		7
							6	10	10		7
							6	10	10		7
							6	10	10		7
							6	10	10		7
							6	10	10		9
							6	10	10		9
							6	10	10		9
							6	10	10		9
							6	10	10		9
							6	10	10		9
							6	10	10		9
							6	10	10		9
							6	10	10		9
							6	10	10		9
							6	10	10		9
							6	10	10		9
							6	10	10		9
							6	10	10		9
							6	10	10		9
							6	10	10		9
							6	10	10		9
							6	10	10		9
							6		10		9
							6		10		9
							6				9
							6				9
							6
							6
							6
							6
							6
							6
							6
							6
							6
							6
							6
							6
							6
							6
							6
							6
							6
							6
							6
							6
							6
							6
							6
							6
							6
							6
							6
							6
							6
							6
							6
							6
							6
							6
							6
							6
							6
							6
							7
							7
							7
1, Class 0; 2, Class a2; 3, Class a3; 4, Class a4; 5, Class b3; 6, Class b7; 7, Class b8; 8, Class b7/a6; 9, Class b8/a6; 10, Class a6.
