# Supplementary material for: Coordination of tissue cell polarity by auxin transport and signaling
Source: eLife. 2019 Dec 3;8:e51061. doi: 10.7554/eLife.51061 (PMC6890459; doi:10.7554/eLife.51061)
Supplement: Figure 9—source data 1. [file elife-51061-fig9-data1.xlsx]

## Sheet: Figure 9 — Source Data 1
Figure 9 — Source Data 1. Distribution of Leaves in Phenotype Classes							Figure 9 — Source Data 1. Distribution Summary of Leaves in Phenotype Classes										Figure 9 — Source Data 1. Statistical Analysis
WT	axr1-3	axr1-12	gn-13	gn-13;axr1-3	gn-13;axr1-12			Class 0	Class a2	Class a3	Class a4	Class a7	Class a8	Class a9	Total			axr1-3	axr1-12	gn-13	gn-13;axr1-3	gn-13;axr1-12
1	1	1	5	5	5		WT	48	1	0	0	0	0	0	49		WT	4.806e-14	8.134e-16	8.057e-21	2.373e-20	3.679e-20
1	1	1	5	5	5		axr1-3	8	9	7	18	0	0	0	42		axr1-3		0.8351	1.992e-17	6.593e-17	9.828e-17
1	1	1	5	5	5		axr1-12	7	20	0	22	0	0	0	49		axr1-12			1.207e-18	4.133e-18	5.813e-18
1	1	1	5	5	5		gn-13	0	0	0	0	38	1	8	47		gn-13				0.6806	0.4161
1	1	1	5	5	5		gn-13;axr1-3	0	0	0	0	35	0	10	45		gn-13;axr1-3					0.7093
1	1	1	5	5	5		gn-13;axr1-12	0	0	0	0	33	2	10	45
1	1	1	5	5	5
1	1	2	5	5	5
1	2	2	5	5	5		Figure 9 — Source Data 1. Frequency of Leaves in Phenotype Classes
1	2	2	5	5	5			Class 0	Class a2	Class a3	Class a4	Class a7	Class a8	Class a9	Total
1	2	2	5	5	5		WT	97.9592	2.04082	0	0	0	0	0	100
1	2	2	5	5	5		axr1-3	19.0476	21.4286	16.6667	42.8571	0	0	0	100
1	2	2	5	5	5		axr1-12	14.2857	40.8163	0	44.898	0	0	0	100
1	2	2	5	5	5		gn-13	0	0	0	0	80.8511	2.12766	17.0213	100
1	2	2	5	5	5		gn-13;axr1-3	0	0	0	0	77.7778	0	22.2222	100
1	2	2	5	5	5		gn-13;axr1-12	0	0	0	0	73.3333	4.44444	22.2222	100
1	2	2	5	5	5
1	3	2	5	5	5
1	3	2	5	5	5
1	3	2	5	5	5
1	3	2	5	5	5
1	3	2	5	5	5
1	3	2	5	5	5
1	3	2	5	5	5
1	4	2	5	5	5
1	4	2	5	5	5
1	4	2	5	5	5
1	4	4	5	5	5
1	4	4	5	5	5
1	4	4	5	5	5
1	4	4	5	5	5
1	4	4	5	5	5
1	4	4	5	5	5
1	4	4	5	5	6
1	4	4	5	5	6
1	4	4	5	7	7
1	4	4	5	7	7
1	4	4	5	7	7
1	4	4	6	7	7
1	4	4	7	7	7
1	4	4	7	7	7
1	4	4	7	7	7
1		4	7	7	7
1		4	7	7	7
1		4	7	7	7
1		4	7
1		4	7
1		4
2		4
1, Class 0; 2, Class a2; 3, Class a3; 4, Class a4; 5, Class a7; 6, Class a8; 7, Class a9.
