# Supplementary material for: Coordination of tissue cell polarity by auxin transport and signaling
Source: eLife journal article supplement (doi:10.7554/elife.51061), 2019-12-03
Supplement: supp2 [file elife-51061-supp2-v1.pdf]

## Supplementary File 2. Supplementary Tables

### Supplementary File 2A. Embryo viability of WT, *pin3;4;7* and *pin2;3;4;7*

| Genotype of self-fertilized parent             | Proportion of viable embryos in siliques of self-fertilized parent (no. of non-aborted seeds / total no. of seeds) | Percentage of viable seeds in siliques of self-fertilized parent |
|------------------------------------------------|--------------------------------------------------------------------------------------------------------------------|------------------------------------------------------------------|
| WT                                             | 293/293                                                                                                            | 100.0                                                            |
| <i>pin3/pin3;pin4/pin4;pin7/pin7</i>           | 275/276                                                                                                            | 99.6                                                             |
| <i>pin2/pin2;pin3/pin3;pin4/pin4;pin7/pin7</i> | 271/271                                                                                                            | 100.0                                                            |

Difference between *pin3;4;7* and WT and between *pin2;3;4;7* and WT was not significant by Kruskal-Wallis and Mann-Whitney test with Bonferroni correction.

**Supplementary File 2B. Embryo viability of *toz*, *mp*, *pin1*, *pin1,3;4;7*, *pin1,3;2;4;7* and *pin1,3,6;4;7;8***

| Genotype of self-fertilized parent                                   | Proportion of viable embryos in siliques of self-fertilized parent (no. of non-aborted seeds / total no. of seeds) | Percentage of viable seeds in siliques of self-fertilized parent |
|----------------------------------------------------------------------|--------------------------------------------------------------------------------------------------------------------|------------------------------------------------------------------|
| <i>TOZ/toz-1</i>                                                     | 202/278                                                                                                            | 72.7                                                             |
| <i>MP/mp</i> <sup>G12</sup>                                          | 264/265 <sup>***</sup>                                                                                             | 99.6                                                             |
| <i>PIN1/pin1-1</i>                                                   | 254/260 <sup>***</sup>                                                                                             | 97.7                                                             |
| <i>PIN1/pin1-134</i>                                                 | 257/258 <sup>***</sup>                                                                                             | 99.6                                                             |
| <i>PIN1/pin1-1,pin3/pin3;pin4/pin4;pin7/pin7</i>                     | 269/272 <sup>***</sup>                                                                                             | 98.9                                                             |
| <i>PIN1/pin1-134,pin3/pin3;pin4/pin4;pin7/pin7</i>                   | 280/281 <sup>***</sup>                                                                                             | 99.6                                                             |
| <i>PIN1/pin1-1,pin3/pin3;pin2/pin2;pin4/pin4;pin7/pin7</i>           | 276/278 <sup>***</sup>                                                                                             | 99.3                                                             |
| <i>PIN1/pin1-1,pin3/pin3,pin6/pin6;pin4/pin4;pin7/pin7;pin8/pin8</i> | 266/268 <sup>***</sup>                                                                                             | 99.2                                                             |

Difference between negative control for completely penetrant embryo lethality (*mp*<sup>G12</sup>) and positive control for completely penetrant embryo lethality (*toz-1*), between *pin1-1* and *toz-1*, between *pin1-134* and *toz-1*, between *pin1-1,3;4;7* and *toz-1*, between *pin1-134,3;4;7* and *toz-1*, between *pin1-1,3;2;4;7* and *toz-1*, and between *pin1-1,3,6;4;7;8* and *toz-1* was significant at  $P < 0.001$  (\*\*\*) by Kruskal-Wallis and Mann-Whitney test with Bonferroni correction. Difference between *pin1-1* and *mp*<sup>G12</sup>, between *pin1-134* and *mp*<sup>G12</sup>, between *pin1-1,3;4;7* and *mp*<sup>G12</sup>, between *pin1-134,3;4;7* and *mp*<sup>G12</sup>, between *pin1-1,3;2;4;7* and *mp*<sup>G12</sup>, and between *pin1-1,3,6;4;7;8* and *mp*<sup>G12</sup> was not significant by Kruskal-Wallis and Mann-Whitney test with Bonferroni correction.

**Supplementary File 2C. Embryo viability of *pin1*, *pin1,3,4;7*, *pin1,3,2;4;7* and *pin1,3,6;4;7;8***

| Genotype of self-fertilized parent                                   | Proportion of embryo-viable mutants in progeny of self-fertilized parent (no. of mutant seedlings / total no. of seedlings) | Percentage of embryo-viable mutants in progeny of self-fertilized parent |
|----------------------------------------------------------------------|-----------------------------------------------------------------------------------------------------------------------------|--------------------------------------------------------------------------|
| <i>PIN1/pin1-1</i>                                                   | 66/239                                                                                                                      | 27.6                                                                     |
| <i>PIN1/pin1-134</i>                                                 | 53/227                                                                                                                      | 23.3                                                                     |
| <i>PIN1/pin1-1,pin3/pin3;pin4/pin4;pin7/pin7</i>                     | 52/196                                                                                                                      | 26.5                                                                     |
| <i>PIN1/pin1-1-134,pin3/pin3;pin4/pin4;pin7/pin7</i>                 | 56/228                                                                                                                      | 24.6                                                                     |
| <i>PIN1/pin1-1,pin3/pin3;pin2/pin2;pin4/pin4;pin7/pin7</i>           | 61/263                                                                                                                      | 23.2                                                                     |
| <i>PIN1/pin1-1,pin3/pin3,pin6/pin6;pin4/pin4;pin7/pin7;pin8/pin8</i> | 65/260                                                                                                                      | 25.0                                                                     |

Difference between observed and theoretical frequency distributions of embryo-viable mutants in the progeny of self-fertilized heterozygous parents was not significant by Pearson's chi-squared ( $\chi^2$ ) goodness-of-fit test ( $\alpha=0.05$ , dF=1).

Supplementary File 2D. Embryo viability of WT, *abcb1*, *abcb19*, *abcb1;19* and *twd1*

| Genotype of self-fertilized parent | Proportion of viable embryos in siliques of self-fertilized parent<br>(no. of non-aborted seeds / total no. of seeds) | Percentage of viable seeds in siliques of self-fertilized parent |
|------------------------------------|-----------------------------------------------------------------------------------------------------------------------|------------------------------------------------------------------|
| WT                                 | 294/294                                                                                                               | 100                                                              |
| <i>abcb1/abcb1</i>                 | 269/272                                                                                                               | 98.9                                                             |
| <i>abcb19/abcb19</i>               | 271/276                                                                                                               | 98.2                                                             |
| <i>abcb1/abcb1;abcb19/abcb19</i>   | 276/332 <sup>***</sup>                                                                                                | 83.1                                                             |
| <i>twd1/twd1</i>                   | 245/265 <sup>***</sup>                                                                                                | 92.4                                                             |

Difference between *abcb1;19* and WT, and between *twd1* and WT was significant at  $P < 0.001$  (\*\*\*). and between *abcb1* and WT, and between *abcb19* and WT was not significant by Kruskal-Wallis and Mann-Whitney test with Bonferroni correction.

**Supplementary File 2E. Embryo viability of *toz*, *mp*, *pin1,3,6* and *pin1,3,6;abcb1;19***

| Genotype of self-fertilized parent                               | Proportion of viable embryos in siliques of self-fertilized parent (no. of non-aborted seeds / total no. of seeds) | Percentage of viable seeds in siliques of self-fertilized parent |
|------------------------------------------------------------------|--------------------------------------------------------------------------------------------------------------------|------------------------------------------------------------------|
| <i>TOZ/toz-1</i>                                                 | 202/277                                                                                                            | 72.9                                                             |
| <i>MP/mp<sup>G12</sup></i>                                       | 255/256 <sup>***</sup>                                                                                             | 99.6                                                             |
| <i>PIN1/pin1-1,pin3/pin3,PIN6/pin6</i>                           | 263/266 <sup>***</sup>                                                                                             | 98.9                                                             |
| <i>PIN1/pin1-1,PIN3/pin3,PIN6/pin6;abcb1/abcb1;abcb19/abcb19</i> | 240/284 <sup>*/***</sup>                                                                                           | 84.5                                                             |

Difference between negative control for completely penetrant embryo lethality (*mp<sup>G12</sup>*) and positive control for completely penetrant embryo lethality (*toz-1*) and between *pin1-1,3,6* and *toz-1* was significant at  $P < 0.001$  (\*\*\*) and between *pin1-1,3,6;abcb1;19* and *toz-1* was significant at  $P < 0.05$  (\*) by Kruskal-Wallis and Mann-Whitney test with Bonferroni correction. Difference between *pin1-1,3,6;abcb1;19* and *mp<sup>G12</sup>* was significant at  $P < 0.001$  (\*\*\*) and between *pin1-1,3,6* and *mp<sup>G12</sup>* was not significant by Kruskal-Wallis and Mann-Whitney test with Bonferroni correction. Linkage in *cis* between *pin1-1* and *pin6* in *PIN1/pin1-1,pin3/pin3,PIN6/pin6* was confirmed by phenotyping the progeny of the self-fertilized *PIN1/pin1-1,pin3/pin3,PIN6/pin6* plants used for the embryo viability analysis for the presence of seedlings with cup-shaped cotyledons, which are characteristic of *pin1,6* double homozygous mutant (Sawchuk et al., 2013). Linkage in *cis* between *pin1-1*, *pin3* and *pin6* in *PIN1/pin1-1,PIN3/pin3,PIN6/pin6;abcb1/abcb1;abcb19/abcb19* was confirmed by phenotyping the progeny of the self-fertilized *PIN1/pin1-1,PIN3/pin3,PIN6/pin6;abcb1/abcb1;abcb19/abcb19* plants used for the embryo viability analysis for the presence of seedlings with cup-shaped cotyledons and by genotyping those cup-shaped-cotyledon seedling for the *pin3* mutation.

Sawchuk, M. G., Edgar, A. and Scarpella, E. (2013). Patterning of leaf vein networks by convergent auxin transport pathways. *PLoS Genet.* **9**, e1003294.

Supplementary File 2F. Embryo viability of *pin1,3,6* and *pin1,3,6;abcb1;19*

| Genotype of self-fertilized parent                               | Proportion of embryo-viable mutants in progeny of self-fertilized parent (no. of mutant seedlings / total no. of seedlings) | Percentage of embryo-viable mutants in progeny of self-fertilized parent |
|------------------------------------------------------------------|-----------------------------------------------------------------------------------------------------------------------------|--------------------------------------------------------------------------|
| <i>PIN1/pin1-1,pin3/pin3,PIN6/pin6</i>                           | 80/361                                                                                                                      | 22.2                                                                     |
| <i>PIN1/pin1-1,PIN3/pin3,PIN6/pin6;abcb1/abcb1;abcb19/abcb19</i> | 74/335                                                                                                                      | 22.1                                                                     |

Difference between observed and theoretical frequency distributions of embryo-viable mutants in the progeny of self-fertilized heterozygous parents was not significant by Pearson's chi-squared ( $\chi^2$ ) goodness-of-fit test ( $\alpha=0.05$ , dF=1). Genotype of the mutants seedlings of *PIN1/pin1-1,pin3/pin3,PIN6/pin6* was confirmed by genotyping all mutant seedlings for *pin1-1* and *pin6* mutation. Genotype of the mutants seedlings of *PIN1/pin1-1,PIN3/pin3,PIN6/pin6;abcb1/abcb1;abcb19/abcb19* was confirmed by genotyping all mutant seedlings for *pin1-1*, *pin3* and *pin6* mutation.

**Supplementary File 2I. Embryo viability of *pin1,3,6* and *pin1,3,6;aux1;lax1***

| Genotype of self-fertilized parent                                 | Proportion of embryo-viable mutants in progeny of self-fertilized parent (no. of mutant seedlings / total no. of seedlings) | Percentage of embryo-viable mutants in progeny of self-fertilized parent |
|--------------------------------------------------------------------|-----------------------------------------------------------------------------------------------------------------------------|--------------------------------------------------------------------------|
| <i>PIN1/pin1-1,pin3/pin3,PIN6/pin6</i>                             | 87/390                                                                                                                      | 22.3                                                                     |
| <i>PIN1/pin1-1,pin3/pin3,PIN6/pin6;aux1/aux1-355;lax1/lax1-064</i> | 109/489                                                                                                                     | 22.3                                                                     |

Difference between observed and theoretical frequency distributions of embryo-viable mutants in the progeny of self-fertilized heterozygous parents was not significant by Pearson's chi-squared ( $\chi^2$ ) goodness-of-fit test ( $\alpha=0.05$ , dF=1). Genotype of the mutants seedlings of both *PIN1/pin1-1,pin3/pin3,PIN6/pin6* and *PIN1/pin1-1,pin3/pin3,PIN6/pin6;aux1/aux1-355;lax1/lax1-064* was confirmed by genotyping all mutant seedlings for *pin1-1* and *pin6* mutation.

Supplementary File 2H. Embryo viability of *toz*, *mp*, *pin1,3,6* and *pin1,3,6;aux1;lax1*

| Genotype of self-fertilized parent                                 | Proportion of viable embryos in siliques of self-fertilized parent (no. of non-aborted seeds / total no. of seeds) | Percentage of viable seeds in siliques of self-fertilized parent |
|--------------------------------------------------------------------|--------------------------------------------------------------------------------------------------------------------|------------------------------------------------------------------|
| <i>TOZ/toz-1</i>                                                   | 185/244 ***                                                                                                        | 75.8                                                             |
| <i>MP/mp</i> <sup>G12</sup>                                        | 220/220                                                                                                            | 100                                                              |
| <i>PIN1/pin1-1,pin3/pin3,PIN6/pin6</i>                             | 259/261 ***                                                                                                        | 99.2                                                             |
| <i>PIN1/pin1-1,pin3/pin3,PIN6/pin6;aux1/aux1-355;lax1/lax1-064</i> | 280/282 ***                                                                                                        | 99.3                                                             |

Difference between negative control for completely penetrant embryo lethality (*mp*<sup>G12</sup>) and positive control for completely penetrant embryo lethality (*toz-1*), between *pin1-1,3,6* and *toz-1*, and between *pin1-1,3,6;aux1-355;lax1-064* and *toz-1* was significant at  $P < 0.001$  (\*\*\*) by Kruskal-Wallis and Mann-Whitney test with Bonferroni correction. Difference between *pin1-1,3,6* and *mp*<sup>G12</sup>, and between *pin1-1,3,6;aux1-355;lax1-064* and *mp*<sup>G12</sup> was not significant by Kruskal-Wallis and Mann-Whitney test with Bonferroni correction. Linkage in *cis* between *pin1-1* and *pin6* in *PIN1/pin1-1,pin3/pin3,PIN6/pin6* and *PIN1/pin1-1,pin3/pin3,PIN6/pin6;aux1/aux1-355;lax1/lax1-064* was confirmed by phenotyping the progeny of the self-fertilized plants used for the embryo viability analysis for the presence of seedlings with cup-shaped cotyledons, which are characteristic of *pin1,6* double homozygous mutant (Sawchuk et al., 2013).

Sawchuk, M. G., Edgar, A. and Scarpella, E. (2013). Patterning of leaf vein networks by convergent auxin transport pathways. *PLoS Genet.* **9**, e1003294.



**Supplementary File 2I. Embryo viability of *pin1,3,6* and *pin1,3,6;aux1;lax1***

| Genotype of self-fertilized parent                                 | Proportion of embryo-viable mutants in progeny of self-fertilized parent (no. of mutant seedlings / total no. of seedlings) | Percentage of embryo-viable mutants in progeny of self-fertilized parent |
|--------------------------------------------------------------------|-----------------------------------------------------------------------------------------------------------------------------|--------------------------------------------------------------------------|
| <i>PIN1/pin1-1,pin3/pin3,PIN6/pin6</i>                             | 87/390                                                                                                                      | 22.3                                                                     |
| <i>PIN1/pin1-1,pin3/pin3,PIN6/pin6;aux1/aux1-355;lax1/lax1-064</i> | 109/489                                                                                                                     | 22.3                                                                     |

Difference between observed and theoretical frequency distributions of embryo-viable mutants in the progeny of self-fertilized heterozygous parents was not significant by Pearson's chi-squared ( $\chi^2$ ) goodness-of-fit test ( $\alpha=0.05$ , dF=1). Genotype of the mutants seedlings of both *PIN1/pin1-1,pin3/pin3,PIN6/pin6* and *PIN1/pin1-1,pin3/pin3,PIN6/pin6;aux1/aux1-355;lax1/lax1-064* was confirmed by genotyping all mutant seedlings for *pin1-1* and *pin6* mutation.

Supplementary File 2G. Embryo viability of WT, *aux1*, *lax1*, *aux1;lax1* and *aux1;lax1;2;3*

| Genotype of self-fertilized parent                  | Proportion of viable embryos in siliques of self-fertilized parent (no. of non-aborted seeds / total no. of seeds) | Percentage of viable seeds in siliques of self-fertilized parent |
|-----------------------------------------------------|--------------------------------------------------------------------------------------------------------------------|------------------------------------------------------------------|
| WT                                                  | 272/274                                                                                                            | 99.3                                                             |
| <i>aux1/aux1-355</i>                                | 266/267                                                                                                            | 99.6                                                             |
| <i>lax1/lax1-064</i>                                | 265/267                                                                                                            | 99.2                                                             |
| <i>aux1/aux1-355;lax1/lax1-064</i>                  | 278/281                                                                                                            | 98.9                                                             |
| <i>aux1/aux1-21;lax1/lax1;lax2/lax2-1;lax3/lax3</i> | 261/262                                                                                                            | 99.6                                                             |

Difference between *aux1-355* and WT, between *lax1-064* and WT, between *aux1-355;lax1-064* and WT, and between *aux1-21;lax1;2-1;3* and WT was not significant by Kruskal-Wallis and Mann-Whitney test with Bonferroni correction.

**Supplementary File 2F. Embryo viability of *pin1,3,6* and *pin1,3,6;abcb1;19***

| <b>Genotype of self-fertilized parent</b>                        | <b>Proportion of embryo-viable mutants in progeny of self-fertilized parent (no. of mutant seedlings / total no. of seedlings)</b> | <b>Percentage of embryo-viable mutants in progeny of self-fertilized parent</b> |
|------------------------------------------------------------------|------------------------------------------------------------------------------------------------------------------------------------|---------------------------------------------------------------------------------|
| <i>PIN1/pin1-1,pin3/pin3,PIN6/pin6</i>                           | 80/361                                                                                                                             | 22.2                                                                            |
| <i>PIN1/pin1-1,PIN3/pin3,PIN6/pin6;abcb1/abcb1;abcb19/abcb19</i> | 74/335                                                                                                                             | 22.1                                                                            |

Difference between observed and theoretical frequency distributions of embryo-viable mutants in the progeny of self-fertilized heterozygous parents was not significant by Pearson's chi-squared ( $\chi^2$ ) goodness-of-fit test ( $\alpha=0.05$ , dF=1). Genotype of the mutants seedlings of *PIN1/pin1-1,pin3/pin3,PIN6/pin6* was confirmed by genotyping all mutant seedlings for *pin1-1* and *pin6* mutation. Genotype of the mutants seedlings of *PIN1/pin1-1,PIN3/pin3,PIN6/pin6;abcb1/abcb1;abcb19/abcb19* was confirmed by genotyping all mutant seedlings for *pin1-1*, *pin3* and *pin6* mutation.

**Supplementary File 2I. Embryo viability of *pin1,3,6* and *pin1,3,6;aux1;lax1***

| Genotype of self-fertilized parent                                 | Proportion of embryo-viable mutants in progeny of self-fertilized parent (no. of mutant seedlings / total no. of seedlings) | Percentage of embryo-viable mutants in progeny of self-fertilized parent |
|--------------------------------------------------------------------|-----------------------------------------------------------------------------------------------------------------------------|--------------------------------------------------------------------------|
| <i>PIN1/pin1-1,pin3/pin3,PIN6/pin6</i>                             | 87/390                                                                                                                      | 22.3                                                                     |
| <i>PIN1/pin1-1,pin3/pin3,PIN6/pin6;aux1/aux1-355;lax1/lax1-064</i> | 109/489                                                                                                                     | 22.3                                                                     |

Difference between observed and theoretical frequency distributions of embryo-viable mutants in the progeny of self-fertilized heterozygous parents was not significant by Pearson's chi-squared ( $\chi^2$ ) goodness-of-fit test ( $\alpha=0.05$ , dF=1). Genotype of the mutants seedlings of both *PIN1/pin1-1,pin3/pin3,PIN6/pin6* and *PIN1/pin1-1,pin3/pin3,PIN6/pin6;aux1/aux1-355;lax1/lax1-064* was confirmed by genotyping all mutant seedlings for *pin1-1* and *pin6* mutation.

Supplementary File 2J. Embryo viability of *axr1;axl*, *tir1;afb2*, *gn;pin1,3,4;7* and *gn;pin1,3,6,4;7;8*

| Genotype of self-fertilized parent                                            | Proportion of viable embryos in siliques of self-fertilized parent<br>(no. of non-aborted seeds / total no. of seeds) | Percentage of viable seeds in siliques of<br>self-fertilized parent |
|-------------------------------------------------------------------------------|-----------------------------------------------------------------------------------------------------------------------|---------------------------------------------------------------------|
| <i>AXR1/axr1-12;AXL/axl</i>                                                   | 900/978                                                                                                               | 92                                                                  |
| <i>TIR1/tir1;AFB2/afb2</i>                                                    | 777/781 <sup>***</sup>                                                                                                | 99.5                                                                |
| <i>GN/gn-13;PIN1/pin1-1,pin3/pin3,pin4/pin4;pin7/pin7</i>                     | 482/484 <sup>***</sup>                                                                                                | 99.6                                                                |
| <i>GN/gn-13;PIN1/pin1-1,pin3/pin3,pin6/pin6;pin4/pin4;pin7/pin7;pin8/pin8</i> | 571/575 <sup>***</sup>                                                                                                | 99.3                                                                |

Difference between negative control for completely penetrant embryo lethality (*tir1;afb2*) and positive control for completely penetrant embryo lethality (*axr1-12;axl*), between *gn;pin1-1,3,4;7* and *axr1-12;axl*, and between *gn;pin1-1,3,6,4;7;8* and *axr1-12;axl* was significant at  $P < 0.001$  (\*\*\*) by Kruskal-Wallis and Mann-Whitney test with Bonferroni correction. Difference between *gn;pin1-1,3,4;7* and *tir1;afb2*, and between *gn;pin1-1,3,6,4;7;8* and *tir1;afb2* was not significant by Kruskal-Wallis and Mann-Whitney test with Bonferroni correction.

**Supplementary File 2K. Embryo viability of *gn;pin1,3,4;7* and *gn;pin1,3,6,4;7;8***

| Genotype of self-fertilized parent                                            | Proportion of embryo-viable mutants in progeny of self-fertilized parent (no. of mutant seedlings / total no. of seedlings) | Percentage of embryo-viable mutants in progeny of self-fertilized parent |
|-------------------------------------------------------------------------------|-----------------------------------------------------------------------------------------------------------------------------|--------------------------------------------------------------------------|
| <i>GN/gn-13;PIN1/pin1-1,pin3/pin3;pin4/pin4;pin7/pin7</i>                     | 256/3624                                                                                                                    | 7.1                                                                      |
| <i>GN/gn-13;PIN1/pin1-1,pin3/pin3,pin6/pin6;pin4/pin4;pin7/pin7;pin8/pin8</i> | 222/3231                                                                                                                    | 6.9                                                                      |

Difference between observed and theoretical frequency distributions of embryo-viable mutants in the progeny of self-fertilized heterozygous parents was not significant by Pearson's chi-squared ( $\chi^2$ ) goodness-of-fit test ( $\alpha=0.05$ , dF=1).

Supplementary File 2L. Embryo viability of WT, *axr1* and *tir1;afb2*

| Genotype of self-fertilized parent | Proportion of viable embryos in siliques of self-fertilized parent (no. of non-aborted seeds / total no. of seeds) | Percentage of viable seeds in siliques of self-fertilized parent |
|------------------------------------|--------------------------------------------------------------------------------------------------------------------|------------------------------------------------------------------|
| WT                                 | 408/412                                                                                                            | 99                                                               |
| <i>axr1-3</i>                      | 391/403                                                                                                            | 97                                                               |
| <i>tir1;afb2</i>                   | 300/303                                                                                                            | 99                                                               |

Difference between *axr1-3* and WT, and between *tir1;afb2* and WT was not significant by Kruskal-Wallis and Mann-Whitney test with Bonferroni correction.

Supplementary File 2M. Embryo viability of *toz*, *mp*, *pin1,3,6;4;7;8*, *pin1,3,6;4;7;8;axr1*,  
*pin1,3,6;4;7;8;tir1;afb2*

| Genotype of self-fertilized parent                                                       | Proportion of viable embryos in<br>siliques of self-fertilized parent<br>(no. of non-aborted seeds /<br>total no. of seeds) | Percentage of<br>viable seeds in<br>siliques of self-<br>fertilized parent |
|------------------------------------------------------------------------------------------|-----------------------------------------------------------------------------------------------------------------------------|----------------------------------------------------------------------------|
| <i>TOZ/toz-1</i>                                                                         | 190/239                                                                                                                     | 79.5                                                                       |
| <i>MP/mp<sup>G12</sup></i>                                                               | 261/262 ***                                                                                                                 | 99.6                                                                       |
| <i>PIN1/pin1-1,pin3/pin3,pin6/pin6;pin4/pin4;pin7/pin7;pin8/pin8</i>                     | 243/244 ***                                                                                                                 | 99.6                                                                       |
| <i>PIN1/pin1-1,pin3/pin3,pin6/pin6;pin4/pin4;pin7/pin7;pin8/pin8;axr1/axr1-3</i>         | 240/248 ***                                                                                                                 | 96.8                                                                       |
| <i>PIN1/pin1-1,pin3/pin3,pin6/pin6;pin4/pin4;pin7/pin7;pin8/pin8;tir1/tir1;afb2/afb2</i> | 473/475 ***                                                                                                                 | 99.6                                                                       |

Difference between negative control for completely penetrant embryo lethality (*mp<sup>G12</sup>*) and positive control for completely penetrant embryo lethality (*toz-1*), between *pin1-1,3,6;4;7;8* and *toz-1*, between *pin1-1,3,6;4;7;8;axr1-3* and *toz-1*, and between *pin1-1,3,6;4;7;8;tir1;afb2* and *toz-1* was significant at  $P < 0.001$  (\*\*\*) by Kruskal-Wallis and Mann-Whitney test with Bonferroni correction. Difference between *pin1-1,3,6;4;7;8* and *mp<sup>G12</sup>*, between *pin1-1,3,6;4;7;8;axr1-3* and *mp<sup>G12</sup>*, and between *pin1-1,3,6;4;7;8;tir1;afb2* and *mp<sup>G12</sup>* was not significant by Kruskal-Wallis and Mann-Whitney test with Bonferroni correction.



**Supplementary File 2N. Embryo viability of *pin1,3,6;4;7;8;axr1* and *pin1,3,6;4;7;8;tir1;afb2***

| Genotype of self-fertilized parent                                                       | Proportion of embryo-viable mutants in progeny of self-fertilized parent (no. of mutant seedlings / total no. of seedlings) | Percentage of embryo-viable mutants in progeny of self-fertilized parent |
|------------------------------------------------------------------------------------------|-----------------------------------------------------------------------------------------------------------------------------|--------------------------------------------------------------------------|
| <i>PIN1/pin1-1,pin3/pin3,pin6/pin6;pin4/pin4;pin7/pin7;pin8/pin8;axr1/axr1-3</i>         | 66/277                                                                                                                      | 23.8                                                                     |
| <i>PIN1/pin1-1,pin3/pin3,pin6/pin6;pin4/pin4;pin7/pin7;pin8/pin8;tir1/tir1;afb2/afb2</i> | 77/324                                                                                                                      | 23.8                                                                     |

Difference between observed and theoretical frequency distributions of embryo-viable mutants in the progeny of self-fertilized heterozygous parents was not significant by Pearson's chi-squared ( $\chi^2$ ) goodness-of-fit test ( $\alpha=0.05$ , dF=1).

Supplementary File 20. Embryo viability of *toz*, *mp*, *gn* and *gn;axr1*

| Genotype of self-fertilized parent | Proportion of viable embryos in siliques of self-fertilized parent<br>(no. of non-aborted seeds / total no. of seeds) | Percentage of viable seeds in siliques of self-fertilized parent |
|------------------------------------|-----------------------------------------------------------------------------------------------------------------------|------------------------------------------------------------------|
| <i>TOZ/toz-1</i>                   | 206/259                                                                                                               | 79.5                                                             |
| <i>MP/mp</i> <sup>G12</sup>        | 243/247 <sup>***</sup>                                                                                                | 98.4                                                             |
| <i>GN/gn-13</i>                    | 248/252 <sup>***</sup>                                                                                                | 98.4                                                             |
| <i>GN/gn-13;axr1/axr1-3</i>        | 264/270 <sup>***</sup>                                                                                                | 97.8                                                             |
| <i>GN/gn-13;axr1/axr1-12</i>       | 214/224 <sup>***</sup>                                                                                                | 95.6                                                             |

Difference between negative control for completely penetrant embryo lethality (*mp*<sup>G12</sup>) and positive control for completely penetrant embryo lethality (*toz-1*), between *gn-13* and *toz-1*, between *gn-13;axr1-3* and *toz-1*, and between *gn-13;axr1-12* and *toz-1* was significant at  $P < 0.001$  (\*\*\*) by Kruskal-Wallis and Mann-Whitney test with Bonferroni correction. Difference between *gn-13* and *mp*<sup>G12</sup>, between *gn-13;axr1-3* and *mp*<sup>G12</sup>, and between *gn-13;axr1-12* and *mp*<sup>G12</sup> was not significant by Kruskal-Wallis and Mann-Whitney test with Bonferroni correction.

**Supplementary File 2P. Embryo viability of *gn* and *gn;axr1***

| <b>Genotype of self-fertilized parent</b> | <b>Proportion of embryo-viable mutants in progeny of self-fertilized parent (no. of mutant seedlings / total no. of seedlings)</b> | <b>Percentage of embryo-viable mutants in progeny of self-fertilized parent</b> |
|-------------------------------------------|------------------------------------------------------------------------------------------------------------------------------------|---------------------------------------------------------------------------------|
| <i>GN/gn-13</i>                           | 101/411                                                                                                                            | 24.6                                                                            |
| <i>GN/gn1-13;axr1-3</i>                   | 74/321                                                                                                                             | 23.0                                                                            |
| <i>GN/gn1-13;axr1-12</i>                  | 70/276                                                                                                                             | 25.4                                                                            |

Difference between observed and theoretical frequency distributions of embryo-viable mutants in the progeny of self-fertilized heterozygous parents was not significant by Pearson's chi-squared ( $\chi^2$ ) goodness-of-fit test ( $\alpha=0.05$ , dF=1).

## Supplementary File 2Q. Genotyping strategies

| Line                                    | Strategy                                                                                                                              |
|-----------------------------------------|---------------------------------------------------------------------------------------------------------------------------------------|
| <i>gn-13</i>                            | <i>GN</i> : ‘SALK_045424 gn LP’ and ‘SALK_045424 gn RP’; <i>gn</i> : ‘SALK_045424 gn RP’ and ‘LBb1.3’                                 |
| <i>gn-18</i>                            | <i>GN</i> : ‘Salk026031 LP gnp close’ and ‘Salk026031 RP gnp close’; <i>gn</i> : ‘Salk026031 RP gnp close’ and ‘LBb1.3’               |
| <i>fwr (gn<sup>fwr</sup>)</i>           | ‘FWR for’ and ‘FWR REV2’; <i>EcoRI</i>                                                                                                |
| <i>van7/emb30-7 (gn<sup>van7</sup>)</i> | ‘van7 Hpa1 FP’ and ‘van7 Hpa1 RP’; <i>HpaI</i>                                                                                        |
| <i>pin1-1</i>                           | ‘pin1-1 F’ and ‘pin1-1 R’; <i>TatI</i>                                                                                                |
| <i>pin1-134</i>                         | ‘pin1-1 F’ and ‘pin1-134 R mse-I’; <i>MseI</i>                                                                                        |
| <i>pin3-3</i>                           | ‘pin3-3 F’ and ‘pin3-3 R’; <i>StyI</i>                                                                                                |
| <i>pin4-2</i>                           | <i>PIN4</i> : ‘PIN4 forw geno II’ and ‘PIN4en rev Ikram’; <i>pin4</i> : ‘PIN4en rev Ikram’ and ‘en primer’                            |
| <i>pin7<sup>En</sup></i>                | <i>PIN7</i> : ‘PIN7en forw Ikram’ and ‘PIN7en rev’; <i>pin7</i> : ‘PIN7en rev Ikram II’ and ‘en primer’                               |
| <i>eir1-1 (pin2)</i>                    | ‘eir1-1 F’ and ‘eir1-1 R’; <i>BseLI</i>                                                                                               |
| <i>pin6</i>                             | <i>PIN6</i> : ‘PIN6 spm F’ and ‘PIN6 spm R’; <i>pin6</i> : ‘PIN6 spm F’ and ‘Spm32’                                                   |
| <i>pin8-1</i>                           | <i>PIN8</i> : ‘SALK_107965 LP’ and ‘SALK_107965 RP’; <i>pin8</i> : ‘SALK_107965 RP’ and ‘LBb1.3’                                      |
| <i>pgp1-100 (abcb1)</i>                 | <i>ABCB1</i> : ‘SALK_083649 pgp1-100 LP’ and ‘SALK_083649 pgp1-100 RP’; <i>abcb1</i> : ‘SALK_083649 pgp1-100 RP’ and ‘LBb1.3’         |
| <i>mdr1-101 (abcb19)</i>                | <i>ABCB19</i> : ‘SALK_033455 atmdr1-101 LP’ and ‘SALK_033455 atmdr1-101 RP’; <i>abcb19</i> : ‘SALK_033455 atmdr1-101 RP’ and ‘LBb1.3’ |
| <i>ucu2-4 (twd1)</i>                    | <i>UCU2</i> : ‘SALK_012836 twd1 LP’ and ‘SALK_012836 twd1 RP’; <i>ucu2</i> : ‘SALK_012836 twd1 RP’ and ‘LBb1.3’                       |
| <i>aux1-21</i>                          | ‘aux1-21 Fwd’ and ‘aux1-21 Rev’; <i>ApaLI</i>                                                                                         |
| <i>lax1</i>                             | <i>LAX1</i> : ‘lax1 Fwd’ and ‘lax1 WT Rev’; <i>lax1</i> : ‘lax1 fwd’ and ‘lax123 mutant Rev’                                          |
| <i>lax2-1</i>                           | <i>LAX2</i> : ‘lax2 Fwd’ and ‘lax2 WT Rev’; <i>lax2</i> : ‘lax2 fwd’ and ‘lax123 mutant Rev’                                          |
| <i>lax3</i>                             | <i>LAX3</i> : ‘lax3 Fwd’ and ‘lax3 WT Rev’; <i>lax3</i> : ‘lax3 fwd’ and ‘dSpm5’                                                      |
| <i>aux1-355</i>                         | <i>AUX1</i> : ‘SALK_020355 LP (aux1)’ and ‘SALK_020355 RP (aux1)’; <i>aux1</i> : ‘SALK_020355 RP (aux1)’ and ‘LBb1.3’                 |
| <i>lax1-064</i>                         | <i>LAX1</i> : ‘SALK_071064 lax1 LP’ and ‘SALK_071064 lax1 RP’; <i>lax1</i> : ‘SALK_071064 lax1 RP’ and ‘LBb1.3’                       |
| <i>axr1-3</i>                           | ‘AXR1-Acc1’ and ‘AXR1-15’; <i>SalI</i>                                                                                                |
| <i>axr1-12</i>                          | ‘axr1-12 forw’ and ‘axr1-12 rev’; <i>DraI</i>                                                                                         |
| <i>axl</i>                              | <i>AXL</i> : ‘AXL SAIL LP’ and ‘AXL SAIL RP’; <i>axl</i> : ‘AXL SAIL RP’ and ‘LB3’                                                    |
| <i>tir1-1</i>                           | ‘tir1-1F2’ and ‘tir1-1R2’, <i>BsaI</i>                                                                                                |
| <i>afb2-3</i>                           | <i>AFB2</i> : ‘AFB2+F’ and ‘AFB2-TR’; <i>afb2</i> : ‘pROK-LB’ and ‘AFB2-TR’                                                           |

**Supplementary File 2R. Light paths**

| <b>Fluorophore</b>       | <b>Laser</b> | <b>Wavelength<br/>(nm)</b> | <b>Main dichroic<br/>beam splitter</b> | <b>First secondary<br/>dichroic beam<br/>splitter</b> | <b>Second secondary<br/>dichroic beam<br/>splitter</b> | <b>Emission filter<br/>(detector)</b> |
|--------------------------|--------------|----------------------------|----------------------------------------|-------------------------------------------------------|--------------------------------------------------------|---------------------------------------|
| YFP                      | Ar           | 514                        | HFT 405/514/594                        | NFT 595                                               | NFT 515                                                | BP 520–555 IR (PMT3)                  |
| GFP;<br>Autofluorescence | Ar           | 488                        | HFT 405/488/594                        | NFT 545                                               | NFT 490 (PMT3);<br>Plate (META)                        | BP 505–530 (PMT3);<br>550–574 (META)  |
| GFP                      | Ar           | 488                        | HFT 405/488/594                        | NFT 545                                               | NFT 490                                                | BP 505–530 (PMT3)                     |
| Lignin                   | Diode        | 405                        | HFT 405/514/594                        | Mirror                                                | NFT 490                                                | BP 420–480 (PMT2)                     |
